CORRECTION

# Correction: Examining the Predictive Validity of NIH Peer Review Scores

The *PLOS ONE* Staff

## Notice of Republication

This article was republished on June 15, 2015, to replace Fig 1, which was incorrect, and to remove confidential or copyrighted material. The publisher apologizes for the errors. Please download this article again to view the correct version.

## Reference

1. Lindner MD, Nakamura RK (2015) Examining the Predictive Validity of NIH Peer Review Scores. PLoS ONE 10(6): e0126938. doi: [10.1371/journal.pone.0126938](https://doi.org/10.1371/journal.pone.0126938) PMID: [26039440](https://pubmed.ncbi.nlm.nih.gov/26039440/)

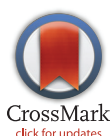

## OPEN ACCESS

**Citation:** The *PLOS ONE* Staff (2015) Correction: Examining the Predictive Validity of NIH Peer Review Scores. PLoS ONE 10(6): e0132202. doi:10.1371/journal.pone.0132202

**Published:** June 29, 2015

**Copyright:** © 2015 The PLOS ONE Staff. This is an open access article distributed under the terms of the [Creative Commons Attribution License](https://creativecommons.org/licenses/by/4.0/), which permits unrestricted use, distribution, and reproduction in any medium, provided the original author and source are credited.
